# Supplementary material for: Behavioural Response Alteration in Caenorhabditis elegans to Urine After Surgical Removal of Cancer: Nematode-NOSE (N-NOSE) for Postoperative Evaluation
Source: PubMed Central journal article supplement — Biomark Cancer. 2019 Dec 24;11:1179299X19896551. doi: 10.1177/1179299X19896551 (PMC6931140; doi:10.1177/1179299x19896551), 2019-12-24
Supplement: Revised_SupplementaryInformation_4_xyz2778816687648.pdf [file Revised_SupplementaryInformation_4_xyz2778816687648.pdf]

Supplemental Figures & Tables

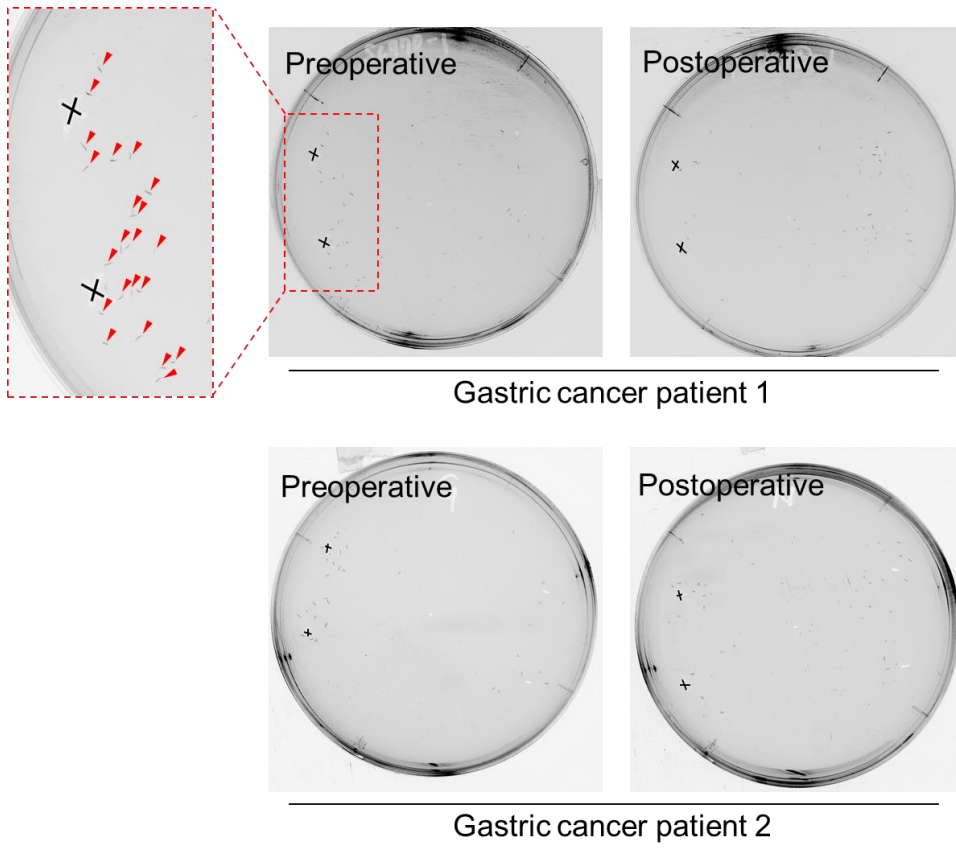

Supplementary Figure S1. Images of chemotaxis assay plates. For clarification of the images and individual animals, the colour was inverted. On the black crosses, the urine sample was spotted. In the enlarged area of the preoperative gastric cancer patient 1, red arrow-heads indicate individual animals. On the yellow crosses, the urine sample was spotted.

Commented [HBS1]: (Replace figure)  
Reviewer 1's 7th comment

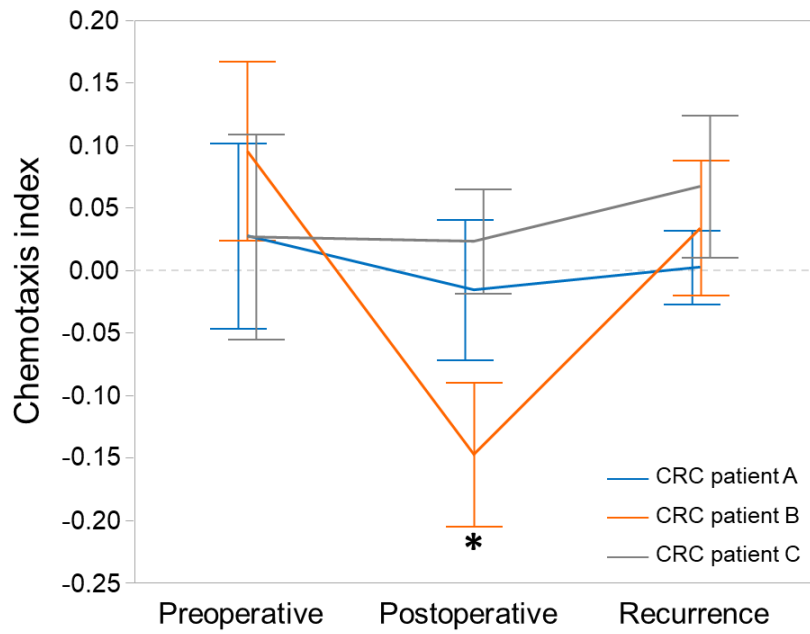

Supplementary Figure S2. Trace of cancer removal and recurrence by N-NOSE. Error bar indicates standard error of the mean. In CRC patient B, an asterisk indicates that the postoperative index was significantly different from the preoperative index (Dunnnett's test,  $p = 0.0163$ ).

Commented [HBS2]: (Modified figure)  
Reviewer 2's 7th comment

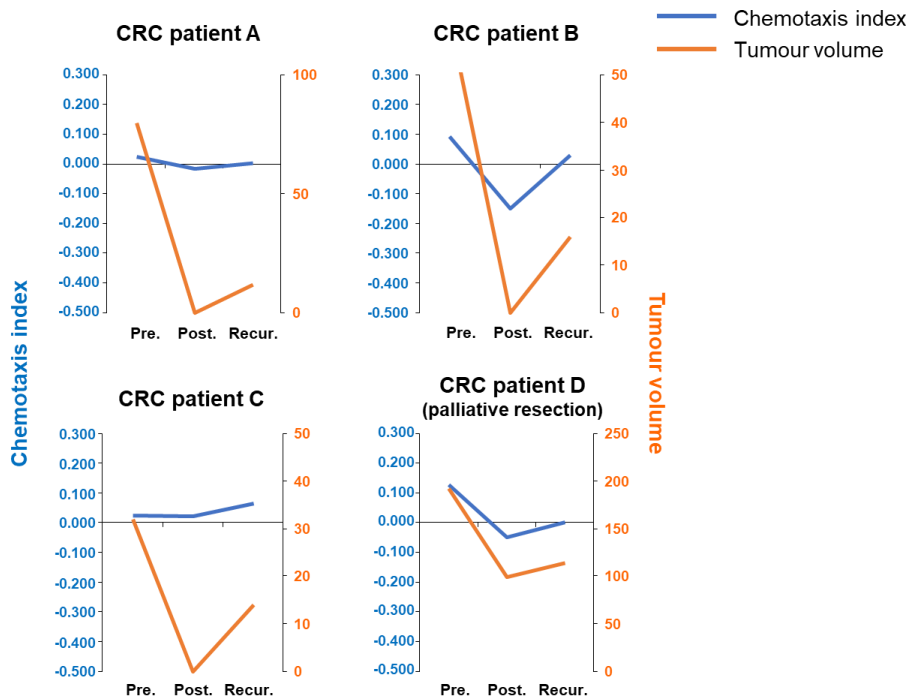

**Supplementary Figure S3. The alteration of tumour volumes.** In the 4 patients in which recurrence was found, the alteration of chemotaxis index and the volume of tumour is described. The volume of tumour was measured according to revised RECIST guideline (version 1.1).

**Commented [HBS3]:** (Added figure)  
Reviewer 2's 8th comment

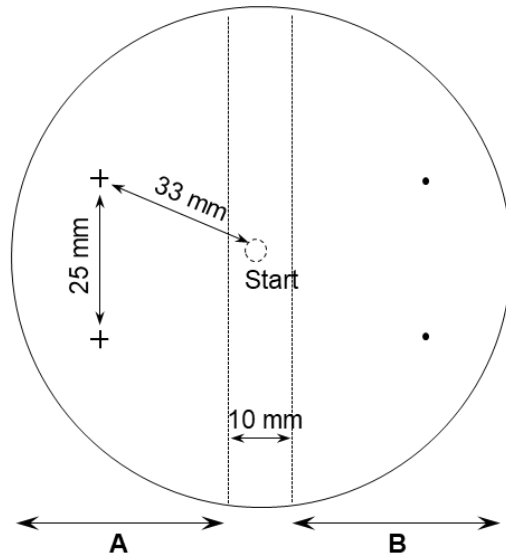

**Supplementary Figure S4** Plate format for counting animals. In the cross marks, urine sample was spotted. The dotted circle indicates the start point that animals were put and started to run. The numbers of animals placed in the area of A and B respectively was used to calculate chemotaxis index as described in Method.

**Commented [HBS4]:** (Added figure)  
Reviewer 1's 5th comment

**Supplementary Table S1.** Values obtained for N-NOSE, CEA, and CA19-9

|                                  | Preoperative               | Postoperative                |
|----------------------------------|----------------------------|------------------------------|
| <u>N-NOSE (chemotaxis index)</u> |                            |                              |
| <u>All cancer</u>                | <u>0.066 (0.036–0.079)</u> | <u>-0.004 (-0.023–0.020)</u> |
| <u>Colorectal cancer</u>         | <u>0.061 (0.027–0.078)</u> | <u>-0.001 (-0.038–0.023)</u> |
| <u>Gastric cancer</u>            | <u>0.070 (0.030–0.107)</u> | <u>-0.019 (-0.039–0.038)</u> |
| <u>CEA</u>                       |                            |                              |
| <u>All cancer</u>                | <u>3.0 (2.2–3.8)</u>       | <u>2.0 (1.6–2.4)</u>         |
| <u>Colorectal cancer</u>         | <u>3.0 (2.3–5.0)</u>       | <u>1.9 (1.4–2.4)</u>         |

**Commented [HBS5]:** (modified table)  
Reviewer 2's 6th comment

|                          |                        |                        |
|--------------------------|------------------------|------------------------|
| <u>Gastric cancer</u>    | <u>2.7 (2.0–3.8)</u>   | <u>2.3 (1.6–3.4)</u>   |
| <u>CA19-9</u>            |                        |                        |
| <u>All cancer</u>        | <u>14.0 (9.8–19.8)</u> | <u>10.2 (8.1–15.3)</u> |
| <u>Colorectal cancer</u> | <u>14.0 (9.8–26.4)</u> | <u>10.1 (7.7–15.7)</u> |
| <u>Gastric cancer</u>    | <u>13.9 (7.8–21.1)</u> | <u>10.3 (7.8–19.9)</u> |

The median and 95% confidence interval were determined for N-NOSE, CEA, and CA19-9 (N = 78 samples).

**Supplementary Table S2. Preoperative and postoperative chemotaxis index of each patient**

| Sample | Preoperative | Postoperative |
|--------|--------------|---------------|
| SC-1   | 0.229        | 0.022         |
| SC-2   | 0.022        | -0.019        |
| SC-3   | 0.107        | 0.105         |
| SC-4   | 0.065        | -0.106        |
| SC-5   | 0.133        | -0.075        |
| SC-6   | 0.089        | -0.099        |
| SC-7   | 0.005        | 0.040         |
| SC-8   | 0.118        | -0.106        |
| SC-9   | 0.144        | 0.054         |
| SC-10  | 0.023        | 0.038         |
| SC-11  | 0.186        | 0.459         |
| SC-12  | 0.199        | -0.066        |
| SC-13  | 0.030        | -0.050        |
| SC-14  | -0.082       | -0.059        |
| SC-15  | -0.054       | -0.027        |
| SC-16  | 0.051        | -0.023        |
| SC-17  | 0.135        | -0.019        |
| SC-18  | 0.076        | 0.049         |
| SC-19  | 0.050        | -0.198        |
| SC-20  | 0.034        | 0.034         |
| SC-21  | 0.080        | 0.061         |
| SC-22  | -0.032       | 0.052         |

**Commented [HBS6]:** (added table)  
Reviewer 1's 2nd comment

|       |        |        |
|-------|--------|--------|
| SC-23 | 0.049  | 0.060  |
| SC-24 | 0.080  | 0.021  |
| SC-25 | 0.105  | 0.004  |
| SC-26 | 0.230  | -0.039 |
| SC-27 | 0.025  | 0.024  |
| SC-28 | 0.016  | -0.023 |
| SC-29 | 0.097  | 0.058  |
| SC-30 | 0.009  | -0.045 |
| SC-31 | -0.053 | -0.020 |
| SC-32 | 0.112  | -0.061 |
| CC-1  | 0.083  | -0.048 |
| CC-2  | 0.135  | 0.002  |
| CC-3  | 0.091  | -0.023 |
| CC-4  | 0.027  | -0.016 |
| CC-5  | 0.016  | 0.187  |
| CC-6  | 0.070  | 0.070  |
| CC-7  | -0.015 | 0.042  |
| CC-8  | 0.146  | 0.000  |
| CC-9  | 0.069  | 0.002  |
| CC-10 | 0.068  | -0.131 |
| CC-11 | 0.115  | 0.009  |
| CC-12 | -0.065 | -0.094 |
| CC-13 | -0.034 | 0.084  |
| CC-14 | 0.039  | -0.022 |
| CC-15 | 0.079  | -0.005 |
| CC-16 | 0.088  | -0.055 |
| CC-17 | 0.095  | -0.148 |
| CC-18 | 0.106  | -0.014 |
| CC-19 | -0.003 | -0.214 |
| CC-20 | 0.042  | -0.064 |
| CC-21 | -0.126 | 0.124  |
| CC-22 | 0.005  | 0.002  |
| CC-23 | 0.120  | -0.109 |
| CC-24 | 0.018  | -0.189 |
| CC-25 | 0.076  | 0.117  |
| CC-26 | -0.027 | -0.038 |
| CC-27 | 0.030  | -0.068 |
| CC-28 | 0.000  | -0.130 |

|       |        |        |
|-------|--------|--------|
| CC-29 | 0.130  | -0.047 |
| CC-30 | 0.132  | 0.079  |
| CC-31 | 0.002  | -0.104 |
| CC-32 | 0.085  | -0.082 |
| CC-33 | 0.036  | -0.238 |
| CC-34 | 0.113  | 0.010  |
| CC-35 | -0.142 | 0.045  |
| CC-36 | 0.072  | 0.057  |
| CC-37 | 0.027  | 0.023  |
| CC-38 | 0.252  | 0.050  |
| CC-39 | 0.068  | 0.035  |
| CC-40 | -0.006 | 0.046  |
| CC-41 | -0.076 | -0.003 |
| CC-42 | 0.070  | 0.049  |
| CC-43 | 0.078  | 0.096  |
| CC-44 | 0.054  | 0.033  |
| CC-45 | 0.042  | -0.046 |
| CC-46 | -0.001 | 0.003  |

In the column of "Sample", "SC-" indicates gastric cancer samples, and "CC-" indicates colorectal cancer samples.
